# Supplementary material for: Assessment of anemia and associated risk factors among children under-five years old in the West Guji Zone, southern Ethiopia: Hospital-based cross-sectional study
Source: PubMed Central journal article supplement (PMC9255756; doi:10.1371/journal.pone.0270853), 2022-07-05
Supplement: pone.0270853.s001.pdf [file pone.0270853.s001.pdf]

**Annex II: Questionnaire**

|                    |      |       |           |
|--------------------|------|-------|-----------|
| Date of interview  | Date | Month | Year      |
| Interviewer's name |      |       | Signature |
| Supervisor's name  |      |       | Signature |

**Part I: Socio-demographic characteristics**

| S.No | Variable                                  | Response                                                                               | Skip to |
|------|-------------------------------------------|----------------------------------------------------------------------------------------|---------|
| Q01  | Age of child?                             | .....Month                                                                             |         |
| Q02  | Sex of child?                             | 1. Male 2. Female                                                                      |         |
| Q03  | Religious of child?                       | 1. Orthodox<br>2. Muslim<br>3. Protestant<br>4. Catholic<br>5. Other<br>(specify)..... |         |
| Q04  | Sex of care giver?                        | 1. Male<br>2. Female                                                                   |         |
| Q05  | What is the marital status of care giver? | 1. Married<br>2. Divorced<br>3. Widowed                                                |         |

|     |                                                                          |                                                                                                                                     |  |
|-----|--------------------------------------------------------------------------|-------------------------------------------------------------------------------------------------------------------------------------|--|
|     |                                                                          | 4. Single<br>5. Other (specify)_____                                                                                                |  |
| Q06 | What is the educational level of care giver?                             | 1. Unable to read and write<br>2. Able to read and write<br>3. Grade 1-8<br>4. Grade 9-12<br>5. College and above                   |  |
| Q07 | What is the current occupational status of care giver relation to child? | 1. Herder<br>2. House wife<br>3. Merchant<br>4. Farmer<br>5. Private employee<br>6. Government employee<br>7. Other (specify) _____ |  |
| Q08 | Sex of household head?                                                   | 1. Male<br>2. Female                                                                                                                |  |
| Q09 | Number of individuals in the house hold?                                 | 1. Two<br>2. Three<br>3. Four<br>4. Five and above                                                                                  |  |
| Q10 | Place of residence?                                                      | 1. Urban<br>2. Rural                                                                                                                |  |
| Q11 | Monthly income of care giver?                                            | 1. < 750 ETB<br>2. 750-1500 ETB<br>3. > 1500 ETB                                                                                    |  |

**Part II Feeding related factor**

|     |                                                            |                 |  |
|-----|------------------------------------------------------------|-----------------|--|
| Q12 | Do you practice dietary diversity during food preparation? | 1. Yes<br>2. No |  |
|-----|------------------------------------------------------------|-----------------|--|

|     |                                                                                                            |                                                                           |  |
|-----|------------------------------------------------------------------------------------------------------------|---------------------------------------------------------------------------|--|
| Q13 | Which product use in dietary diversity?                                                                    | 1. Animal product<br>2. Plant product<br>3. Both                          |  |
| Q14 | When start introduction of complementary foods?                                                            | 1. < or = 6 months<br>2. > 6 months                                       |  |
| Q15 | Duration of breast feeding practice?                                                                       | 1. < 6month<br>2. 6-12month<br>3. 1-2year<br>4. Above 2years              |  |
| Q16 | Do you have nutritional knowledge?                                                                         | 1. Yes<br>2. No                                                           |  |
| Q17 | In the past four weeks, did you worry that your household would not have enough food?<br>(Food insecurity) | 1. Yes<br>2. No                                                           |  |
| Q18 | A child does take animal products (meat, egg milk...?)                                                     | 1. Yes<br>2. No                                                           |  |
| Q19 | Meal frequency per day?                                                                                    | 1. One times<br>2. Two times<br>3. Three times<br>4. Four times and above |  |

**Part III: Health Care and Diseases Characteristics**

| No_ | Question                                           | Response        | Skip to |
|-----|----------------------------------------------------|-----------------|---------|
| Q20 | Recent history of acute blood loss in past 4 week? | 1. Yes<br>2. No |         |
| Q21 | History of recent blood transfusion                | 1. Yes          |         |

|     |                                                                                    |                 |  |
|-----|------------------------------------------------------------------------------------|-----------------|--|
|     | reaction?                                                                          | 2. No           |  |
| Q22 | History of recent surgical procedure?                                              | 1. Yes<br>2. No |  |
| Q23 | Recent history of accident?                                                        | 1. Yes<br>2. No |  |
| Q24 | History of intestinal protozoan infections (Amoebiasis, Giardiasis) in past weeks? | 1. Yes<br>2. No |  |
| Q25 | History of soil-transmitted helminthic infection?                                  | 1. Yes<br>2. No |  |
| Q26 | History of malaria infection?                                                      | 1. Yes<br>2. No |  |
| Q27 | Recent history of epistaxis?                                                       | 1. Yes<br>2. No |  |
| Q28 | History of Chronic diseases?                                                       | 1. Yes<br>2. No |  |

**Annex III: Laboratory report form**

Serial no \_\_\_\_\_

Date of specimen collection: \_\_\_\_\_ time: \_\_\_\_\_

**Blood examination**

- CBC examination report
